# Supplementary material for: A separation voltage polarity switching method for higher sample loading capacity and better separation resolution in transient capillary isotachophoresis separation
Source: Royal Society of Chemistry journal article supplement (doi:10.1039/c8an01779d), 2018-11-16
Supplement: c8an01779d1.pdf [file c8an01779d1.pdf]

**Electronic Supplementary Material (ESI) for**

**A Separation Voltage Polarity Switching Method for Higher Sample Loading  
Capacity and Better Separation Resolution in Transient Capillary  
Isotachopheresis Separation**

Huanming Wu<sup>†</sup>, Lian Yi<sup>‡</sup>, Roza Wojcik<sup>‡</sup>, Tujin Shi<sup>‡</sup>, and Keqi Tang<sup>#\*</sup>

<sup>†</sup>Faculty of Electrical Engineering and Computer Science, Ningbo University, Ningbo 315211, P.  
R. China

<sup>‡</sup>Biological Sciences Division, Pacific Northwest National Laboratory, Richland, Washington  
99352, United States

<sup>#</sup>School of Material Science and Chemical Engineering, Ningbo University, Ningbo 315211, P. R. China

\*Corresponding author: tangkeqi@nbu.edu.cn

**The following supplementary tables and figure are included**

Table S1. Repeatability of tCITP separation from five replicating experiments by using two selected peptides in 2  $\mu$ M sample concentration and at 45% sample loading

Figure S1. Sample flow rate measurement at 5 psi nitrogen pressure

Figure S2. UV records from five replicates of tCITP separation for two peptides in 2  $\mu$ M sample concentration and at 45% sample loading

Figure S3. Comparison of the UV records from tCITP separations of the two peptides in 2  $\mu$ M concentration and blank LE solvent

Figure S4. Six overlapped UV records of tCITP separations of individual peptide solution including Kempptide, bradykinin, angiotensin I, resin substrate, neurotensin and angiotensin II at 2  $\mu$ M concentration

Figure S5. Three continuous PS-tCITP separations of the six selected peptides at 2  $\mu$ M concentration and 50% sample loading

Table S1. Repeatability of tCITP separation from five replicating experiments by using two selected peptides in 2  $\mu$ M sample concentration and at 45% sample loading

| Test Index  | Area1 | Area2 | Begin Time1 (min) | End Time1 (min) | Begin Time2 (min) | End Time2 (min) | FWHM1 (min) | FWHM2 (min) | Center1 (min) | Center2 (min) | Difference of Migration Times (min) | Height1 (mAU) | Height2 (mAU) |
|-------------|-------|-------|-------------------|-----------------|-------------------|-----------------|-------------|-------------|---------------|---------------|-------------------------------------|---------------|---------------|
| 1           | 0.111 | 0.107 | 14.183            | 14.393          | 14.570            | 14.803          | 0.079       | 0.101       | 14.246        | 14.616        | 0.370                               | 1.360         | 1.033         |
| 2           | 0.109 | 0.106 | 14.244            | 14.446          | 14.608            | 14.843          | 0.077       | 0.100       | 14.289        | 14.654        | 0.365                               | 1.363         | 1.032         |
| 3           | 0.110 | 0.106 | 14.222            | 14.432          | 14.589            | 14.810          | 0.077       | 0.099       | 14.282        | 14.639        | 0.357                               | 1.381         | 1.047         |
| 4           | 0.110 | 0.109 | 14.211            | 14.416          | 14.563            | 14.816          | 0.075       | 0.098       | 14.263        | 14.611        | 0.348                               | 1.418         | 1.066         |
| 5           | 0.108 | 0.102 | 14.228            | 14.418          | 14.576            | 14.783          | 0.074       | 0.095       | 14.278        | 14.621        | 0.343                               | 1.408         | 1.043         |
| STDEV.P (%) | 0.1   | 0.3   | 2.0               | 1.8             | 1.6               | 1.9             | 0.2         | 0.2         | 1.5           | 1.6           | 1.0                                 | 2.3           | 1.2           |

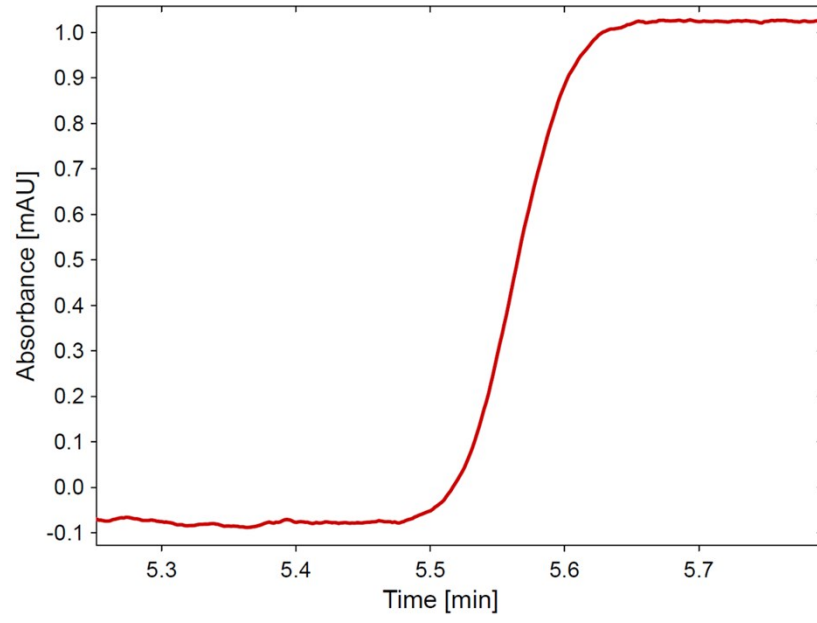

Figure S1. Sample flow rate measurement at 5 psi nitrogen pressure

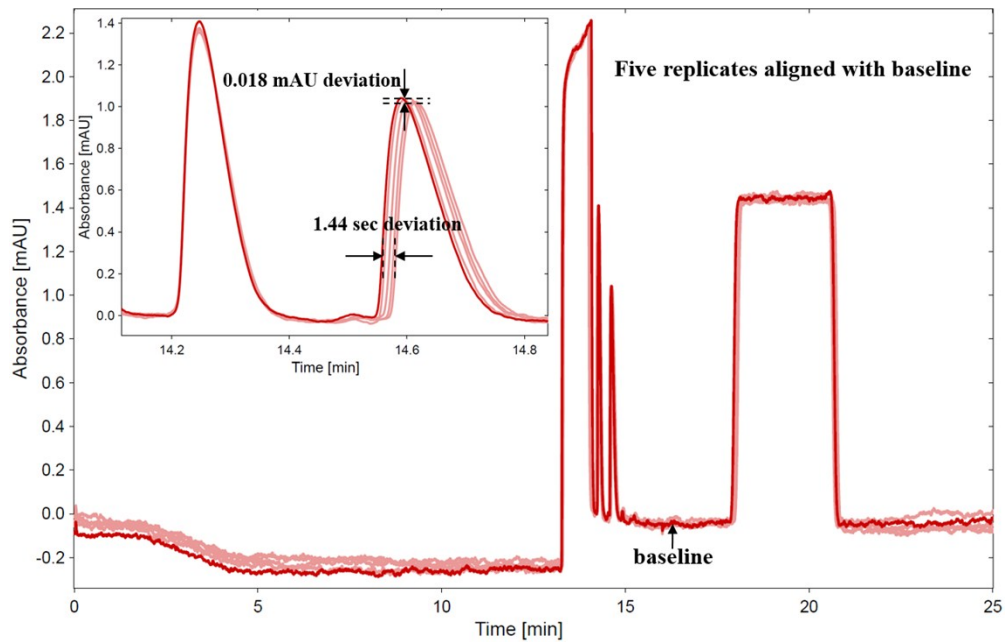

Figure S2. UV records from five replicates of tCITP separation for two peptides in 2  $\mu$ M sample concentration and at 45% sample loading

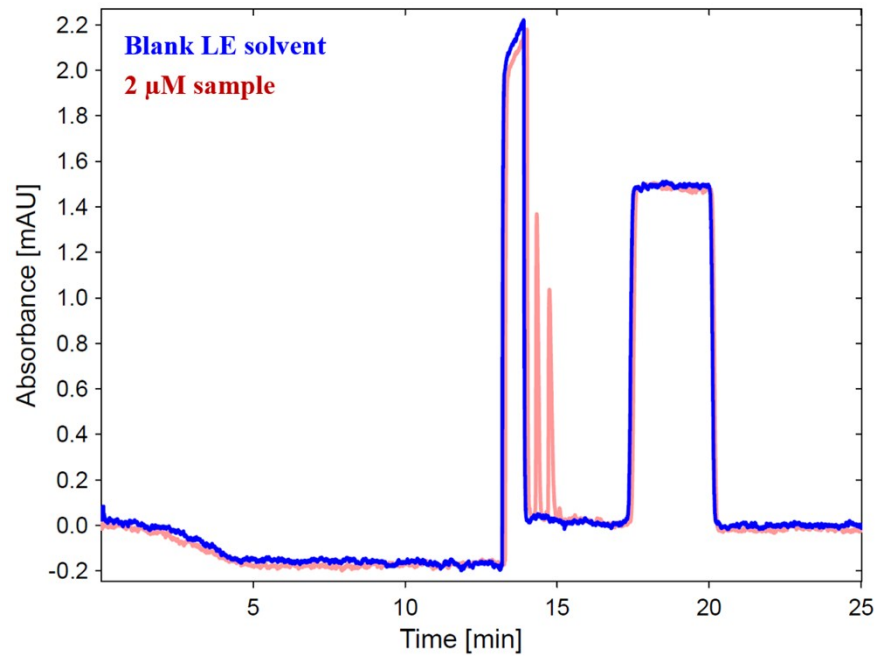

Figure S3. Comparison of the UV records from tCITP separations of the two peptides in 2  $\mu\text{M}$  concentration and blank LE solvent

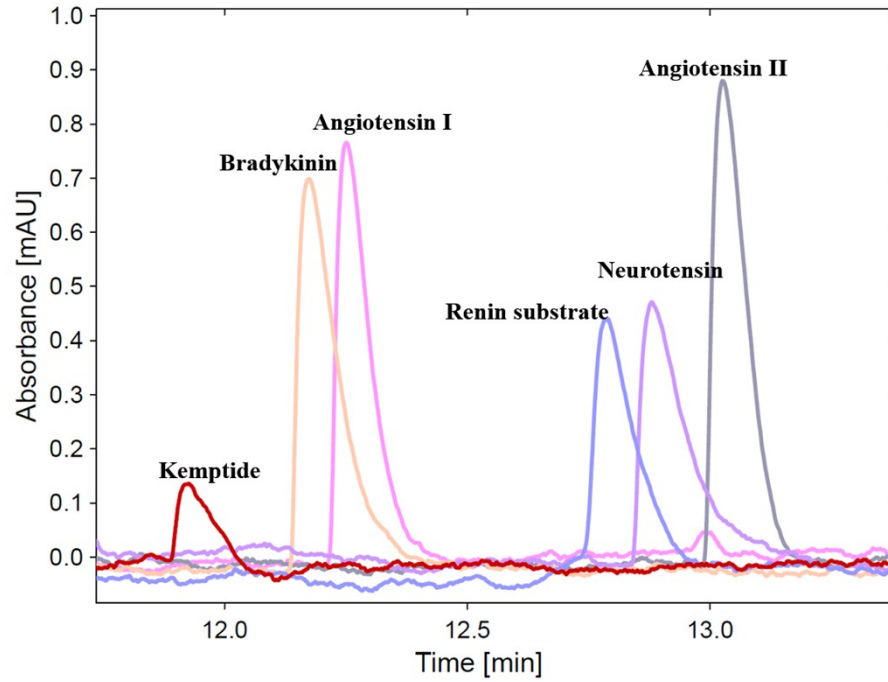

Figure S4. Six overlapped UV records of tCITP separations of individual peptide solution including Kemptide, bradykinin, angiotensin I, renin substrate, neurotensin and angiotensin II at 2  $\mu$ M concentration

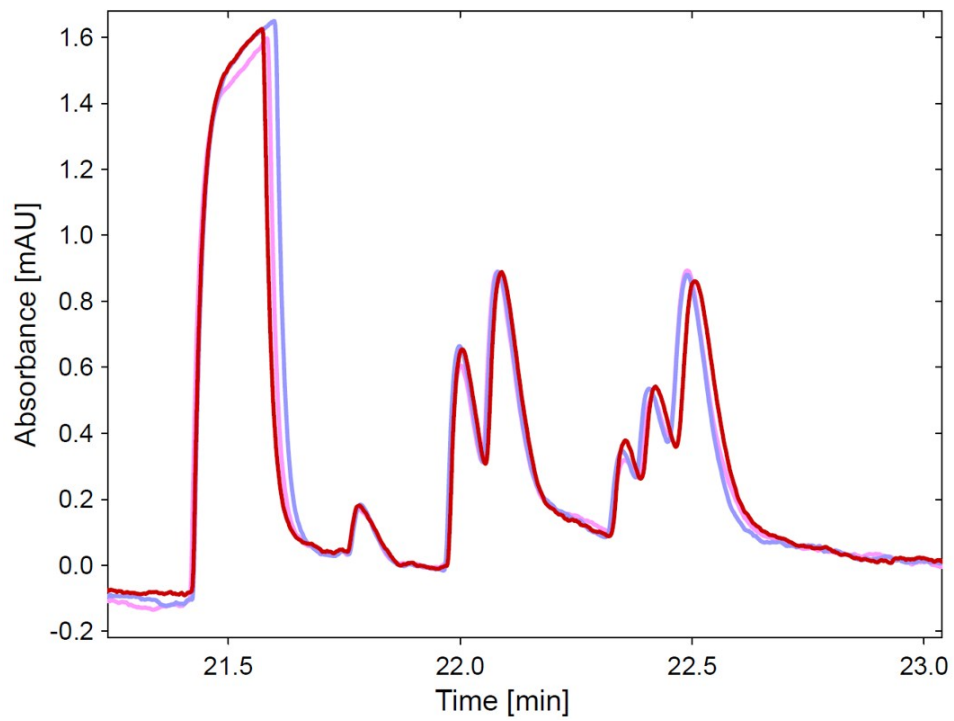

Figure S5. Three continuous PS-tCITP separations of the six selected peptides at 2  $\mu\text{M}$  concentration and 50% sample loading
